# Supplementary material for: Productive visualization of high-throughput sequencing data using the SeqCode open portable platform
Source: PubMed Central journal article supplement (PMC8486768; doi:10.1038/s41598-021-98889-7), 2021-10-01
Supplement: 41598_2021_98889_MOESM11_ESM.pdf [file 41598_2021_98889_MOESM11_ESM.pdf]

a

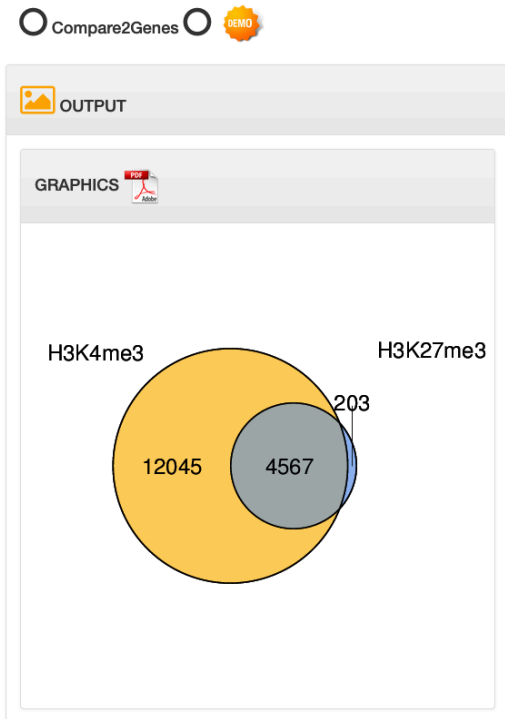

b

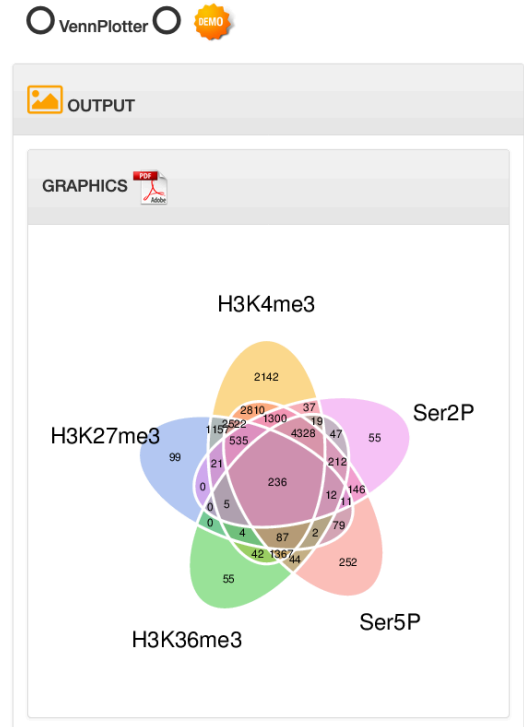

c

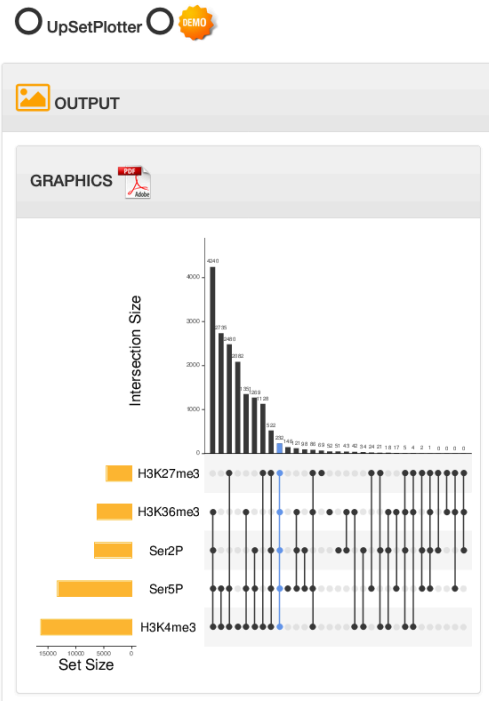

d

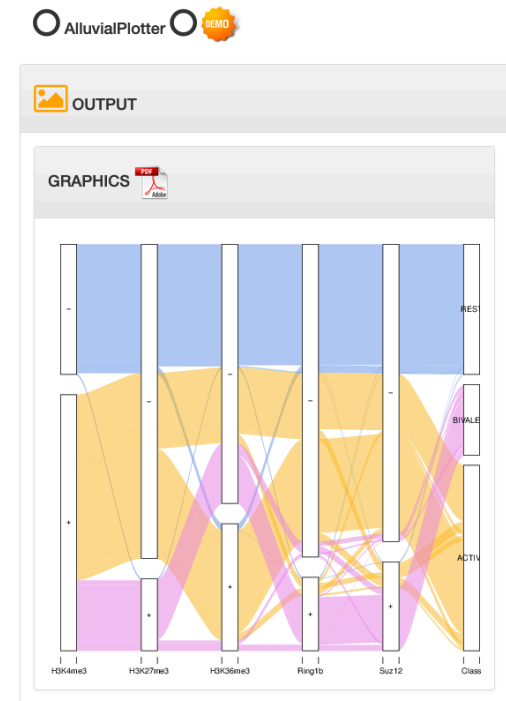

Suppl. Fig. 11.

Gene Sets tools of the SeqCode web site
