# Supplementary material for: Productive visualization of high-throughput sequencing data using the SeqCode open portable platform
Source: PubMed Central journal article supplement (PMC8486768; doi:10.1038/s41598-021-98889-7), 2021-10-01
Supplement: 41598_2021_98889_MOESM15_ESM.pdf [file 41598_2021_98889_MOESM15_ESM.pdf]

What visualization is appropriate to address each question on a biological feature?

a Is the analysis involving one experiment?

b Is the analysis involving multiple experiments (replicates/conditions)?

**Q1** Is the fresh sequencing in good shape? 

**Q2** Is this feature appearing in sharp or broad sites?  

**Q3** Is there a preference for a region (TSS, body, intergenic)?   

**Q4** Is a group of genomic items enriched in this feature?   

**Q5** Which are the target genes of this feature? 

VISUALIZATIONS

-  Boxplots
-  Heatmaps
-  Matching
-  Meta-plots
-  Pie charts
-  Profiles
-  Scatterplots
-  UpSets
-  Venn chart

**Q6** Are profile patterns distinct over a particular region? 

**Q7** Is there a significant signal gain/loss between samples?    

**Q8** Is a change reported in the preference for a genomic region?   

**Q9** Is there a balance between the signal of two samples?   

**Q10** Which are the common and specific targets between samples?   

Suppl. Fig. 15. Guidelines of selection of alternative visualizations depending on the biological question
